# Supplementary material for: An Insight into Occurrence, Biology, and Pathogenesis of Rice Root-Knot Nematode Meloidogyne graminicola
Source: MDPI journal article supplement (doi:10.3390/biology12070987), 2023-07-11

## Supplementary file 1.

I. Testing of the Protein Models using Ramachandran Plot using the web server SAVES SERVER(<https://saves.mbi.ucla.edu/>)

### 1. Phospholipase B like Protein

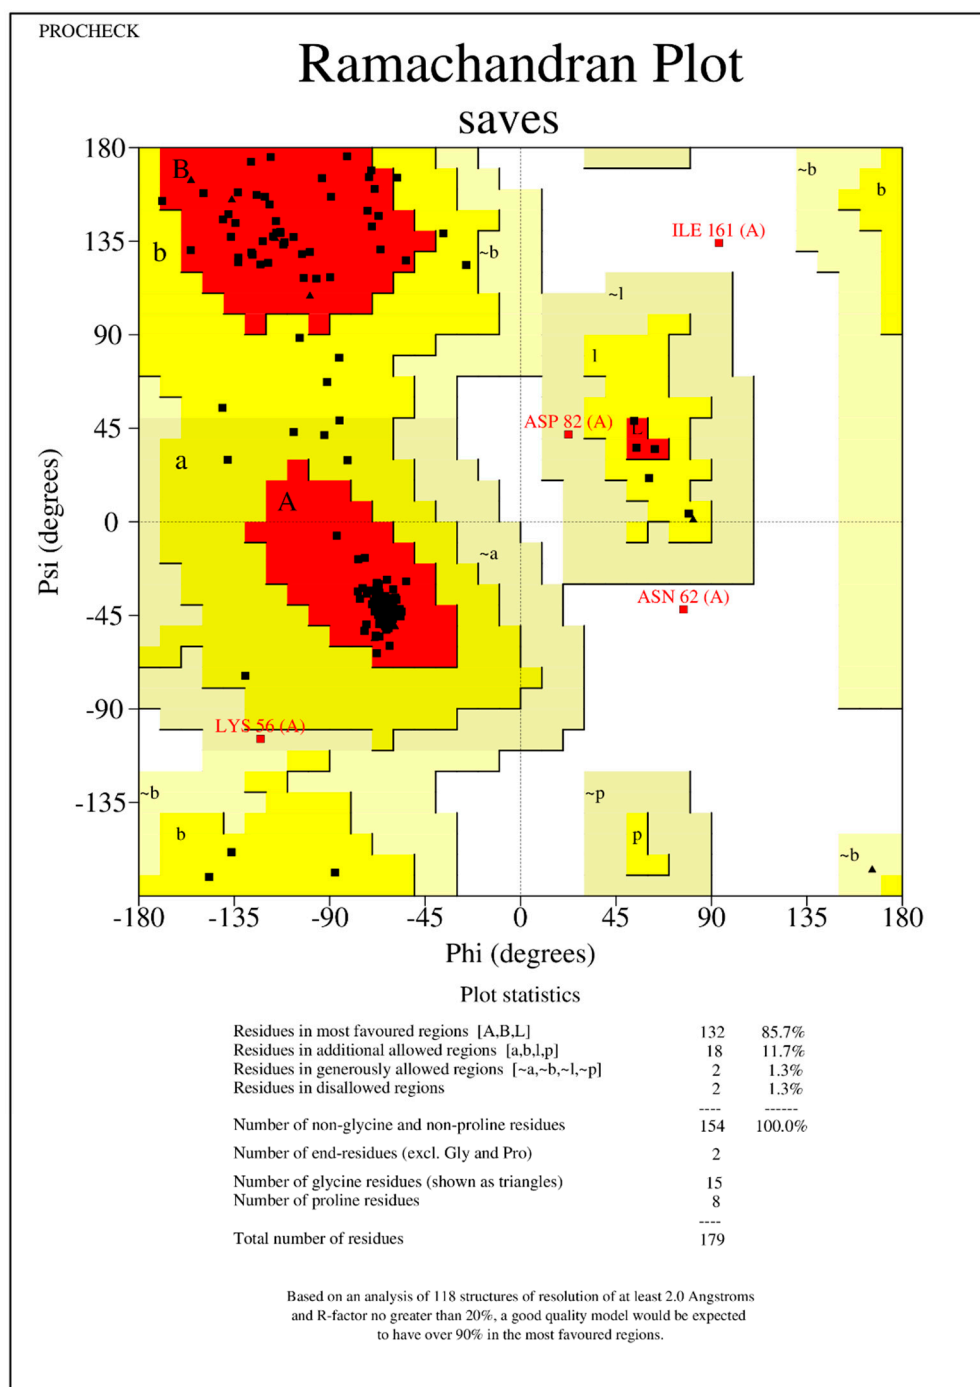

saves\_01.ps

2. G protein couple receptor

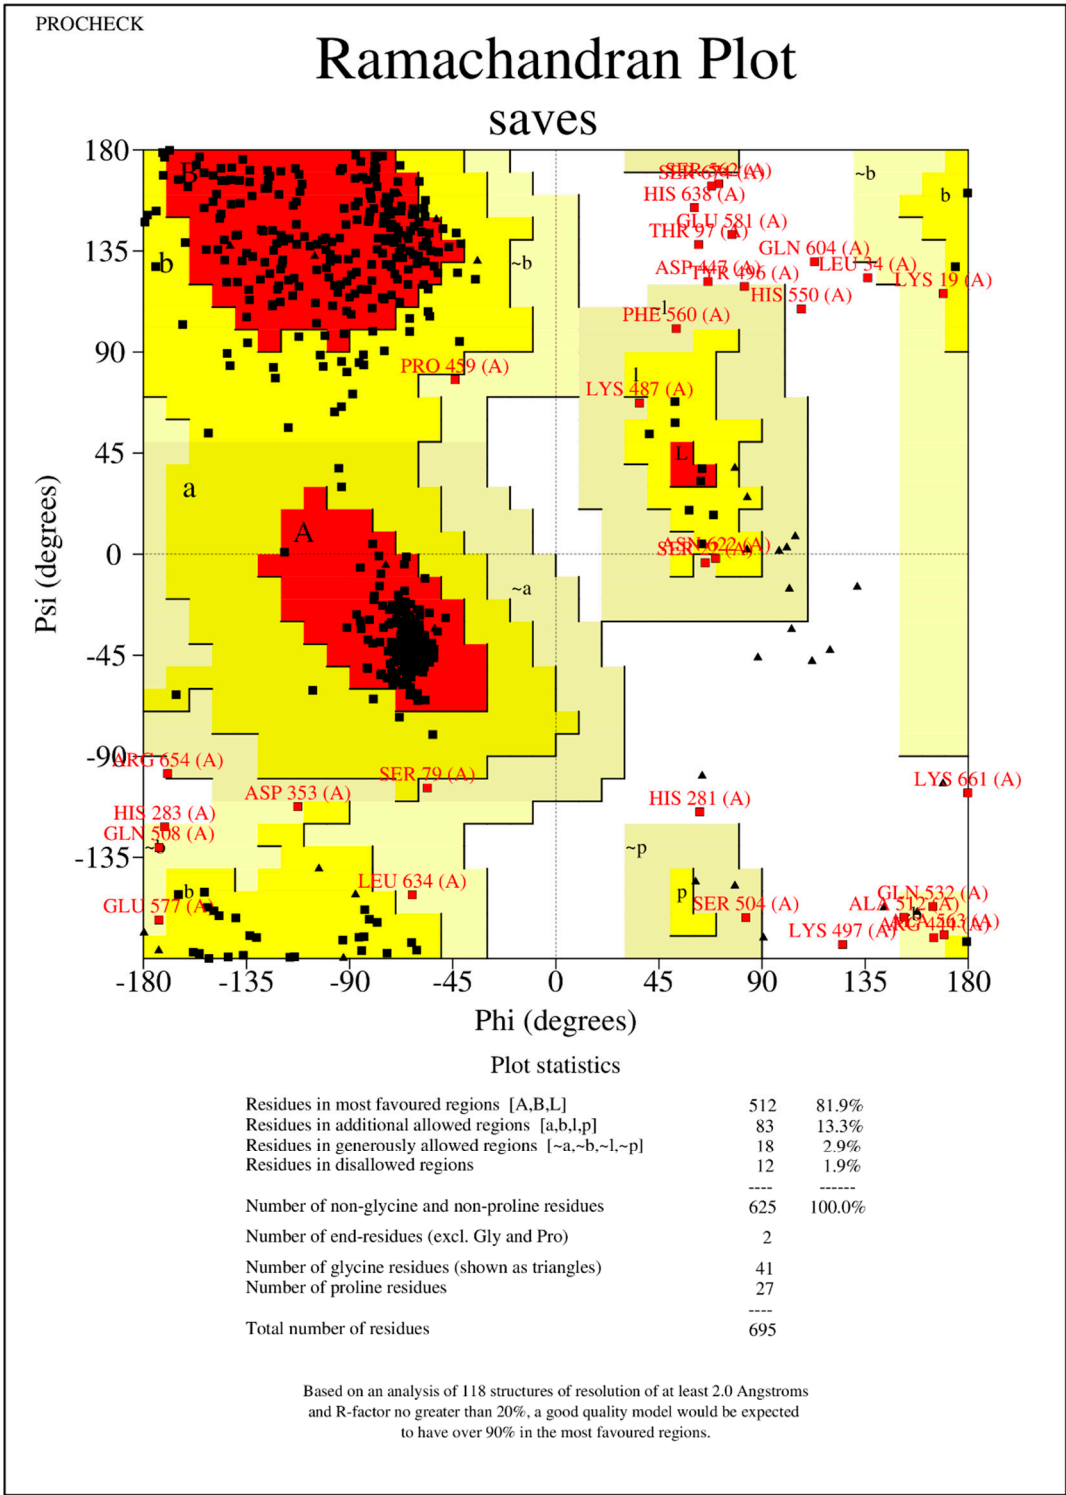

saves\_01.ps

3. Endoglucanase

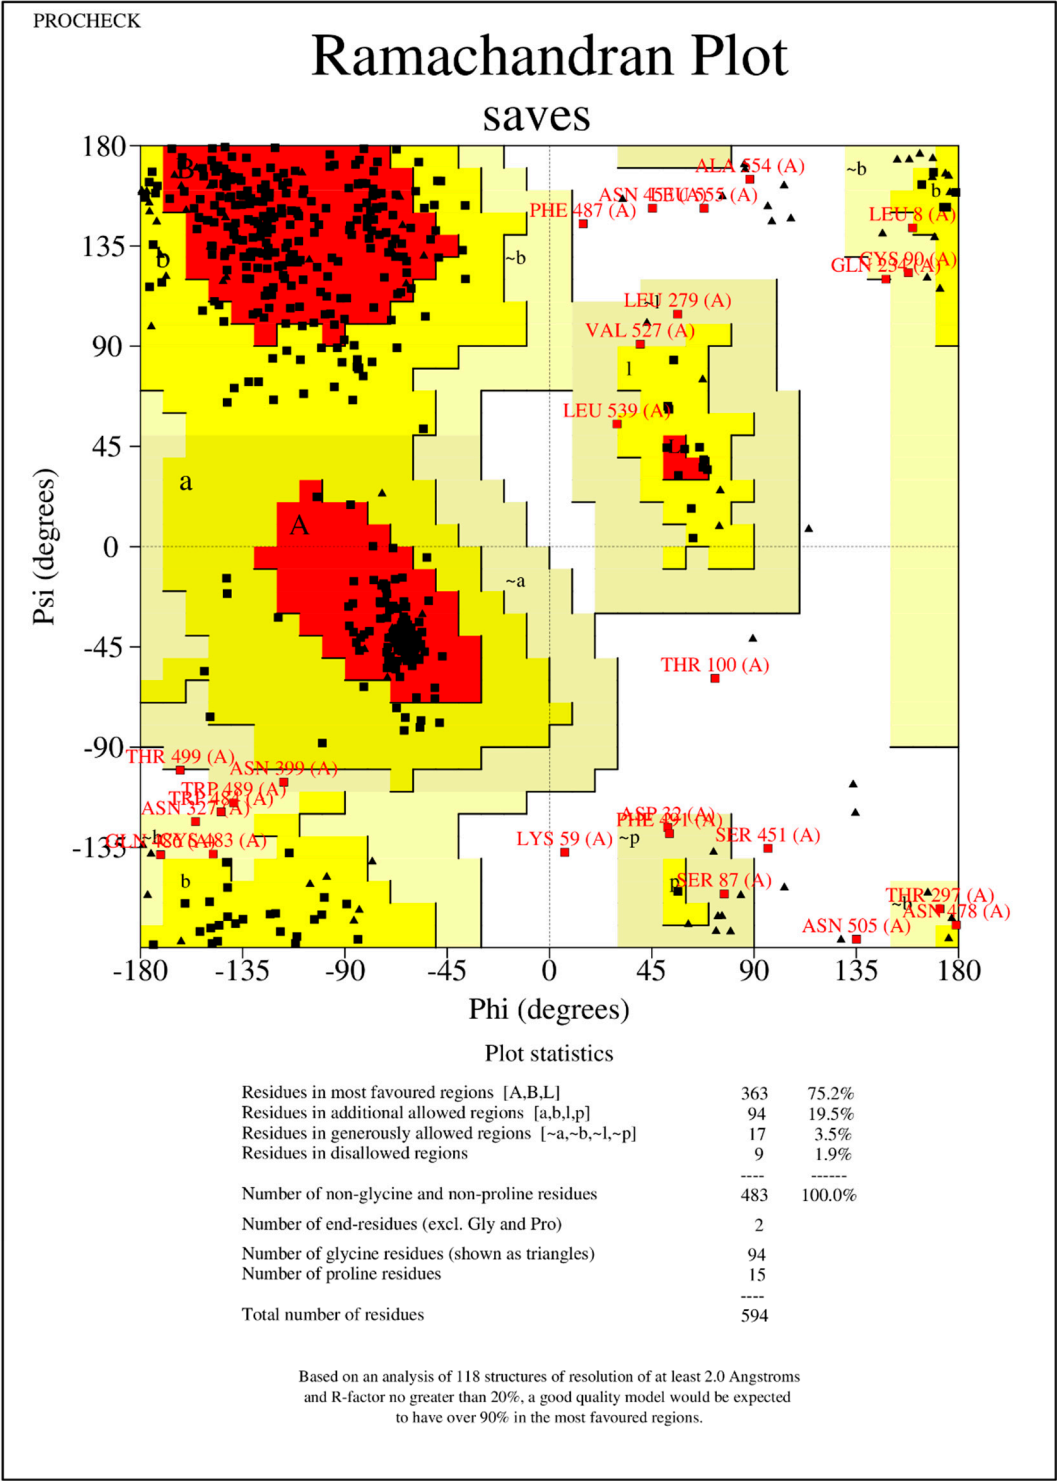

saves\_01.ps

4. Pectate lyase

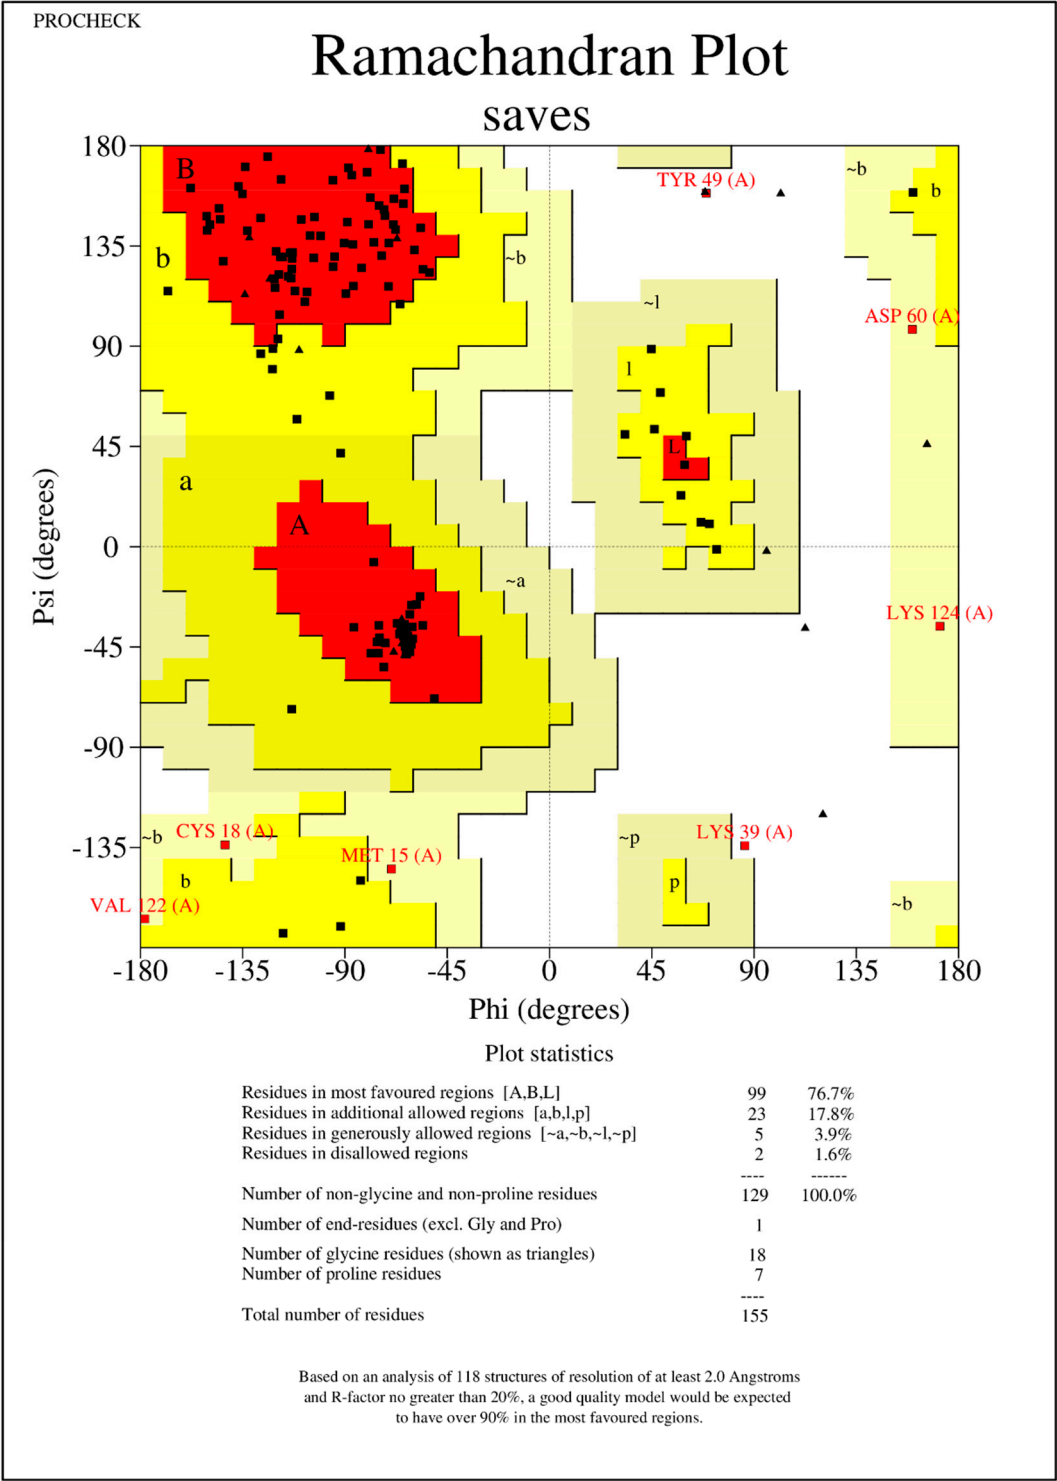

saves\_01.ps

---

## II. Developed protein models for molecular docking studies

### a. G Protein receptor kinase

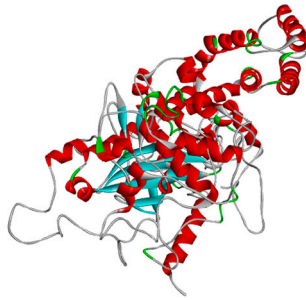

### b. Beta 1,4 endoglucanase

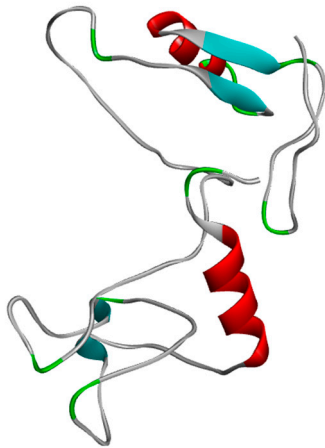

### c. Phospholipase

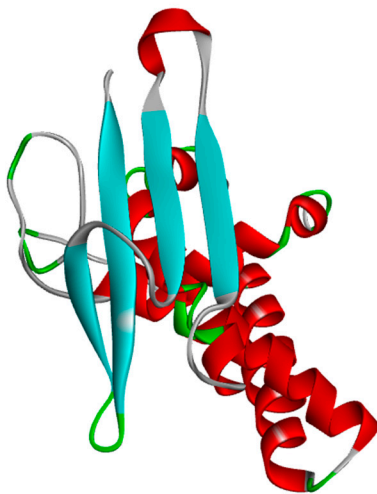

#### d. Pectate lyase

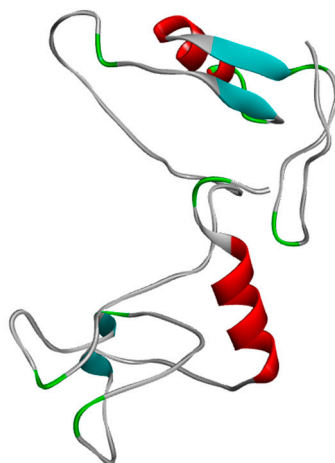

### III. Binding affinity (kcal/mol) Of small molecules on different virulent proteins of *M. graminicola*

#### a. Pectate lyase vs 4-O-Beta-D-Galactopyranosyl-Alpha-D-Glucopyranose

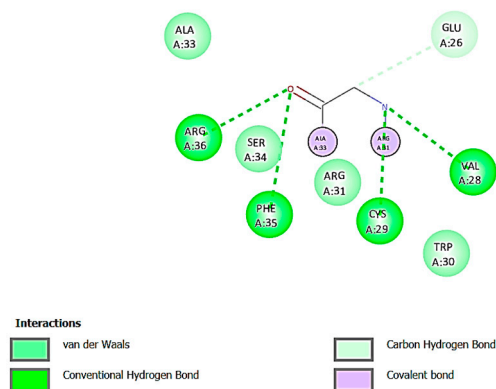

#### b. Pectate lyase vs Beta-D-Galacturonic Acid

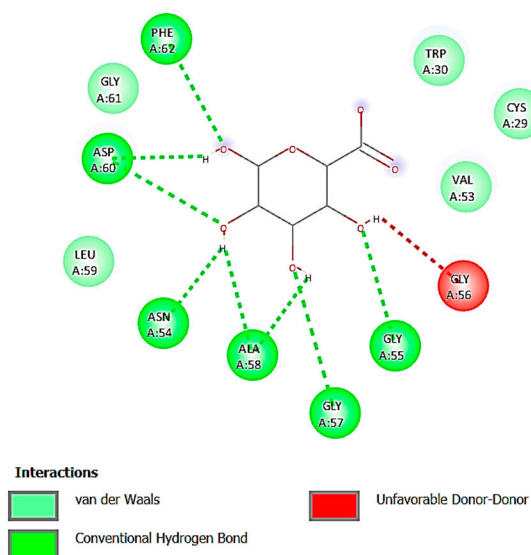

c. Pectate lyase vs (2S)-2-amino-3-phenylpropanoic acid

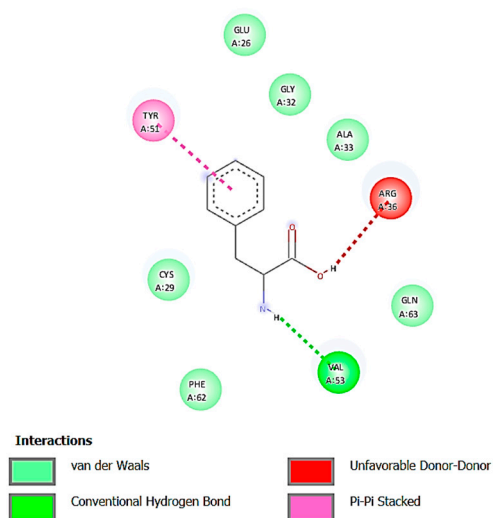

d. Pectate lyase vs 2,6,10,15,19,23-hexamethyltetracosane

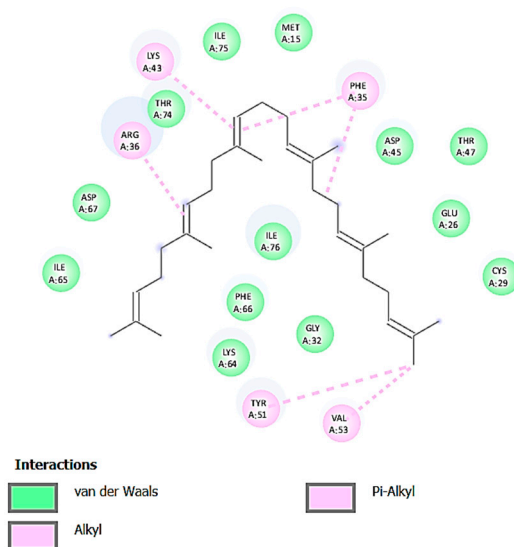

### e. G Protein kinase vs (2S)-2-amino-3-phenylpropanoic acid

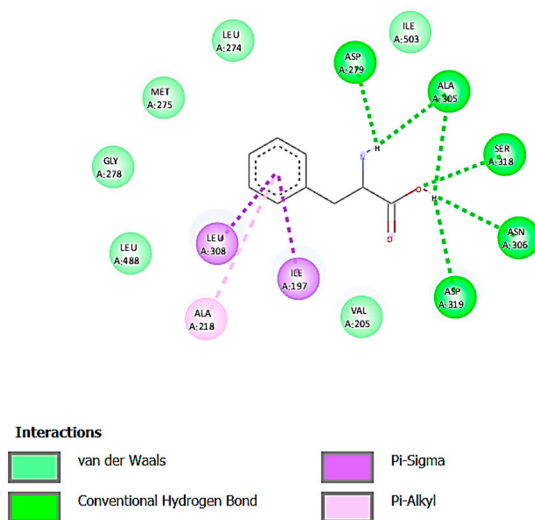

### f. G Protein kinase vs 4-O-Beta-D-Galactopyranosyl-Alpha-D-Glucopyranose

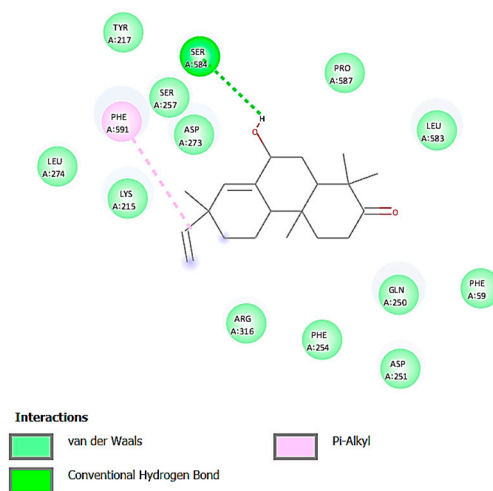



### g. G Protein kinase vs Beta-D-Galacturonic Acid

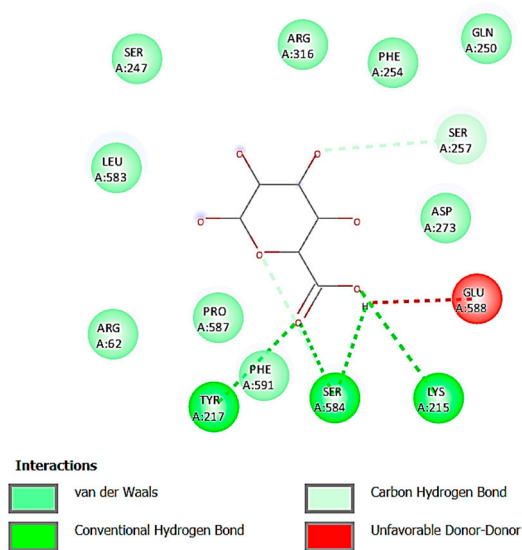

### h. G Protein kinase vs 2,6,10,15,19,23-hexamethyltetracosane

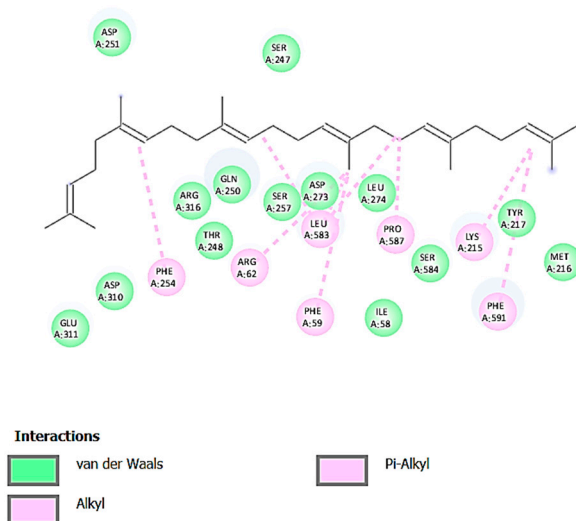

### i. b-1,4-endoglucanase vs 2,6,10,15,19,23-hexamethyltetracosane

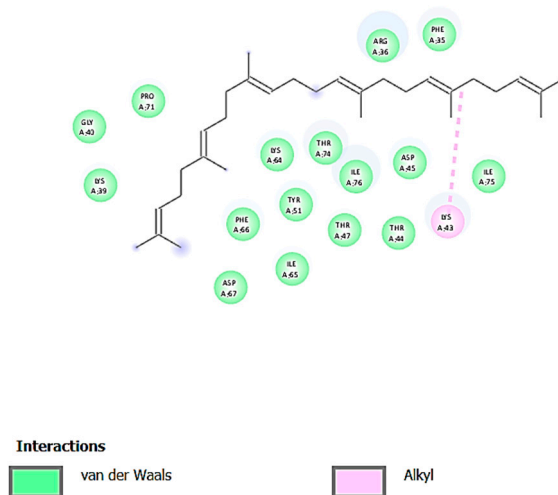

j. b-1,4-endoglucanase vs (2S)-2-amino-3-phenylpropanoic acid

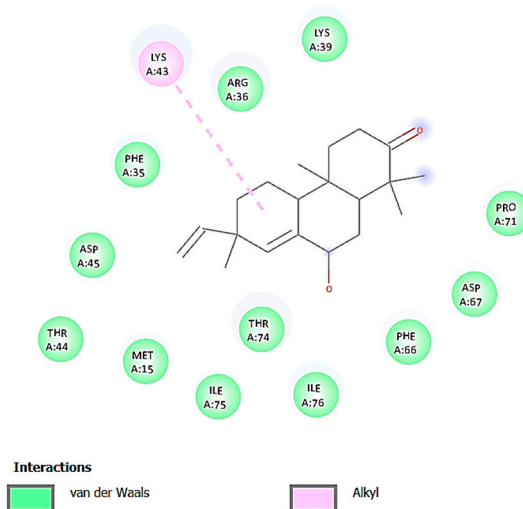

k. b-1,4-endoglucanase vs 4-O-Beta-D-Galactopyranosyl-Alpha-D-Glucopyranose

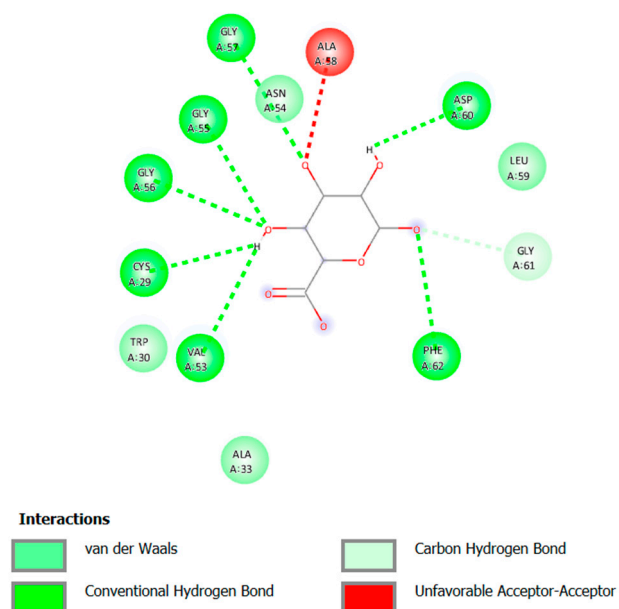

## l. b-1,4-endoglucanase vs Beta-D-Galacturonic Acid

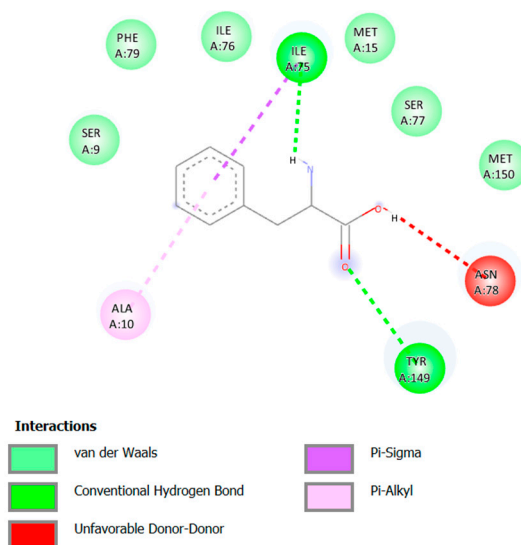

## m. Phospholipase vs Beta-D-Galacturonic Acid

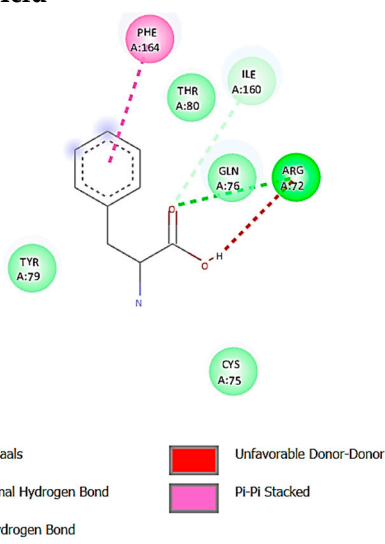

## n. Phospholipase vs (2S)-2-amino-3-phenylpropanoic acid

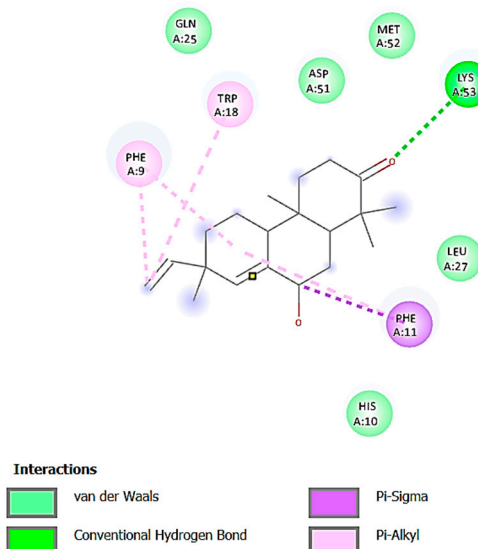

o. Phospholipase vs 4-O-Beta-D-Galactopyranosyl-Alpha-D-Glucopyranose

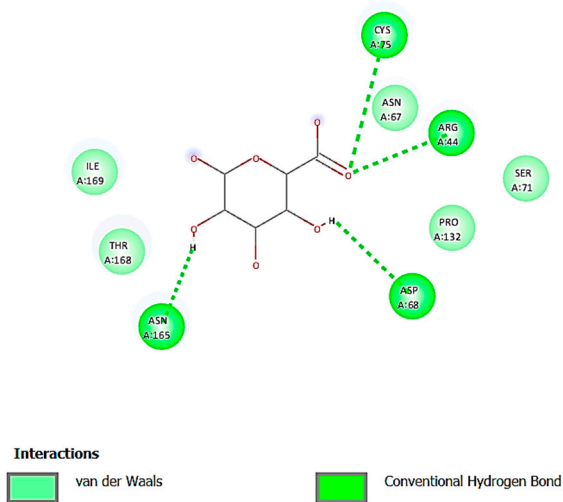

p. Phospholipase vs 2,6,10,15,19,23-hexamethyltetracosane

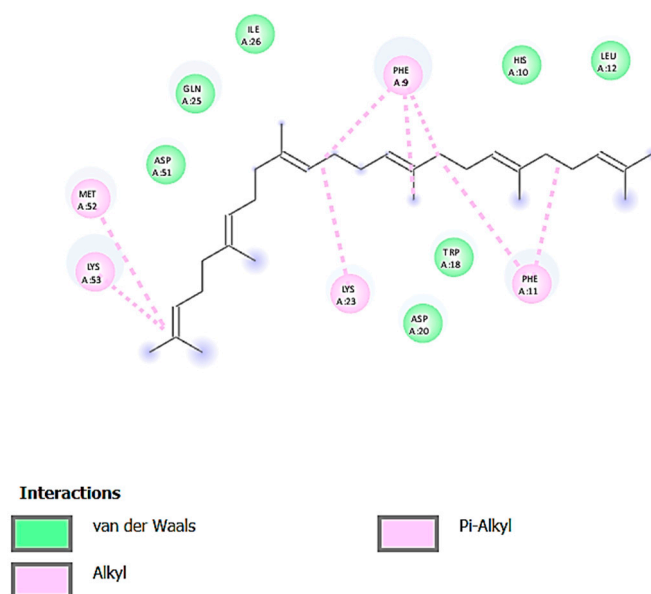

Supplement: s1 [file s1]
